# Supplementary material for: Bi-functional reduced graphene oxide/AgCo composite nanosheets: an efficient catalyst and SERS substrate for monitoring the catalytic reactions
Source: Royal Society of Chemistry journal article supplement (doi:10.1039/c7ra07216c), 2017-01-01
Supplement: c7ra07216c1.pdf [file c7ra07216c1.pdf]

**Electronic Supplementary Information**

**Bi-functional reduced graphene oxide/AgCo composite nanosheets: an efficient  
catalyst and SERS substrate for monitoring of the catalytic reaction**

Xiaowei Ma, Yue Guo, Jing Jin, Bing Zhao, Wei Song,\*

*State Key Laboratory of Supramolecular Structure and Materials, Jilin University,*

*Changchun 130012, P. R. China*

*\*Corresponding author:*

*Fax & Tel.: +86-431-85168473; E-mail: [weisong@jlu.edu.cn](mailto:weisong@jlu.edu.cn)*

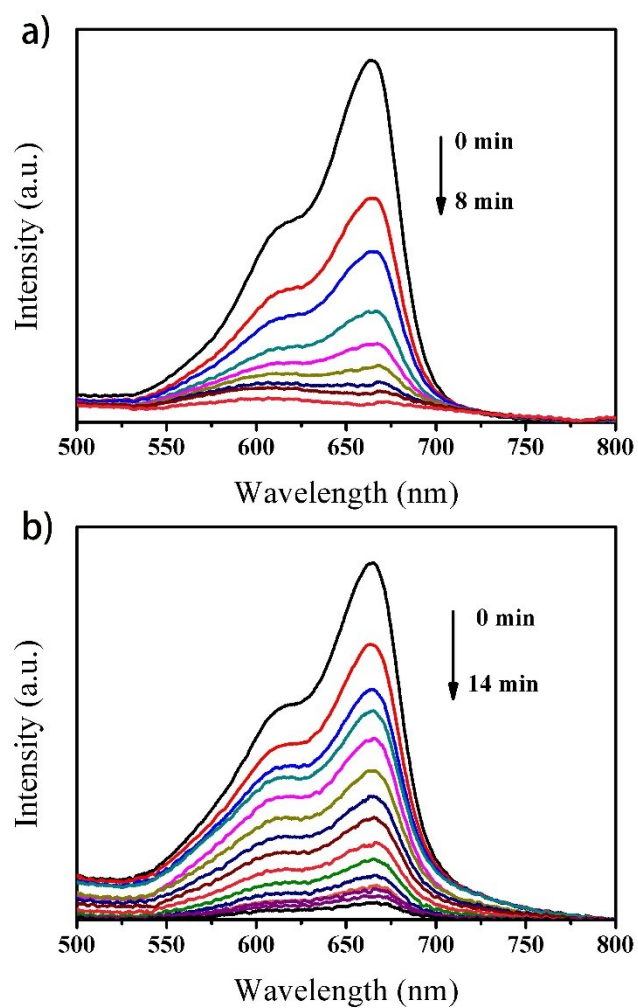

**Fig. S1** a) UV-Vis absorption spectra for the reduction of MB by NaBH<sub>4</sub> in the presence of rGO/AgCo catalyst; b) UV-Vis absorption spectra for the degradation of MB under UV light in the presence of rGO/AgCo catalyst.

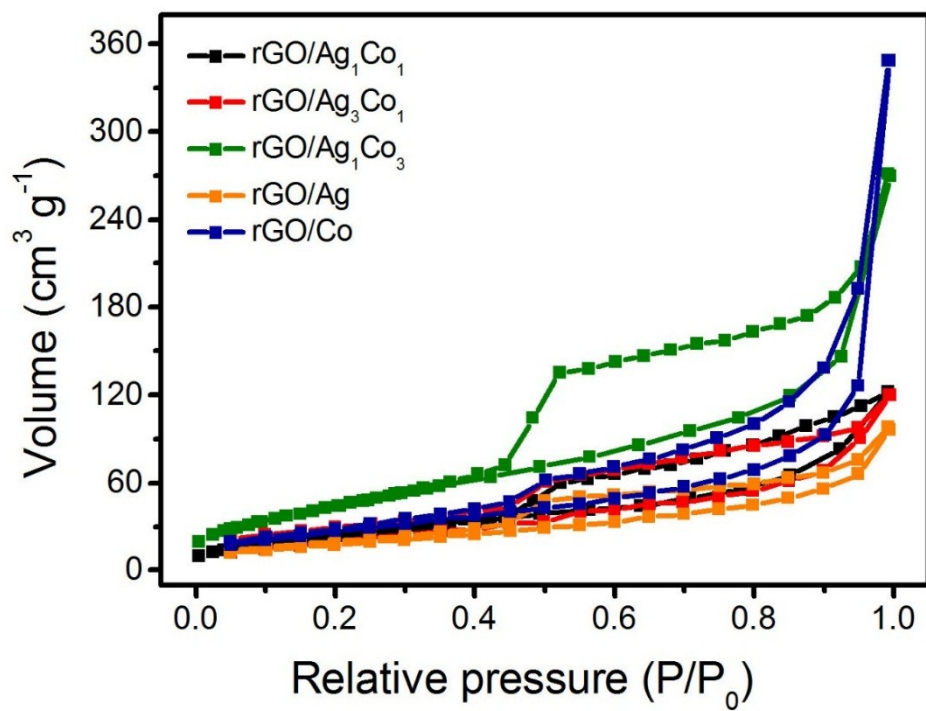

**Fig. S2** Nitrogen adsorption–desorption isotherms of the prepared catalysts including  $\text{rGO/Ag}_1\text{Co}_1$ ,  $\text{rGO/Ag}_3\text{Co}_1$ ,  $\text{rGO/Ag}_1\text{Co}_3$ ,  $\text{rGO/Ag}$  and  $\text{rGO/Co}$  composite nanosheets.

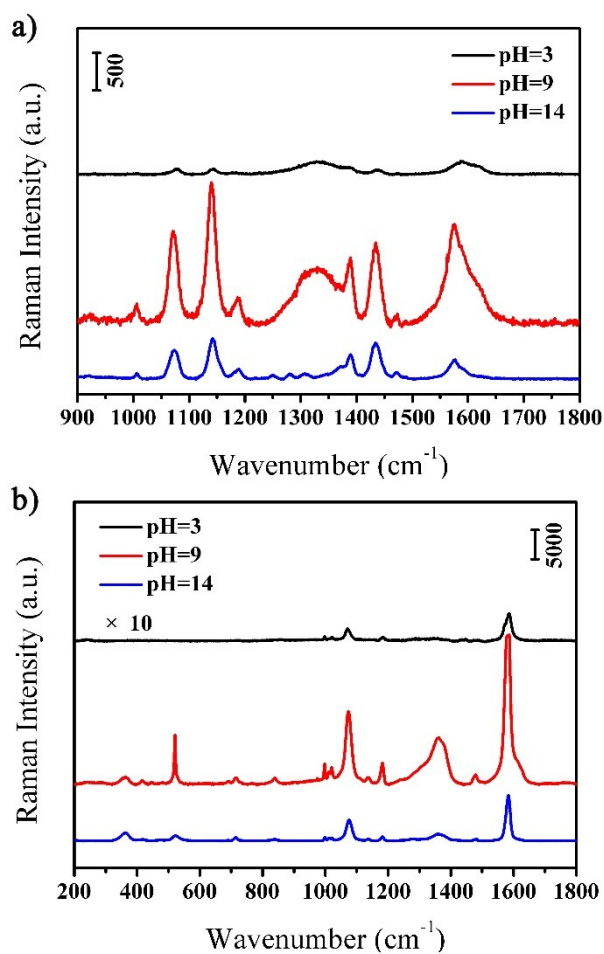

**Fig. S3** SERS spectra of a) PATP molecules and b) MBA molecules with a concentration of  $10^{-5}$  M on the surface of rGO/AgCo composite nanosheets that synthesized in a mixing solution with different pH values after the addition of the reducing agent.

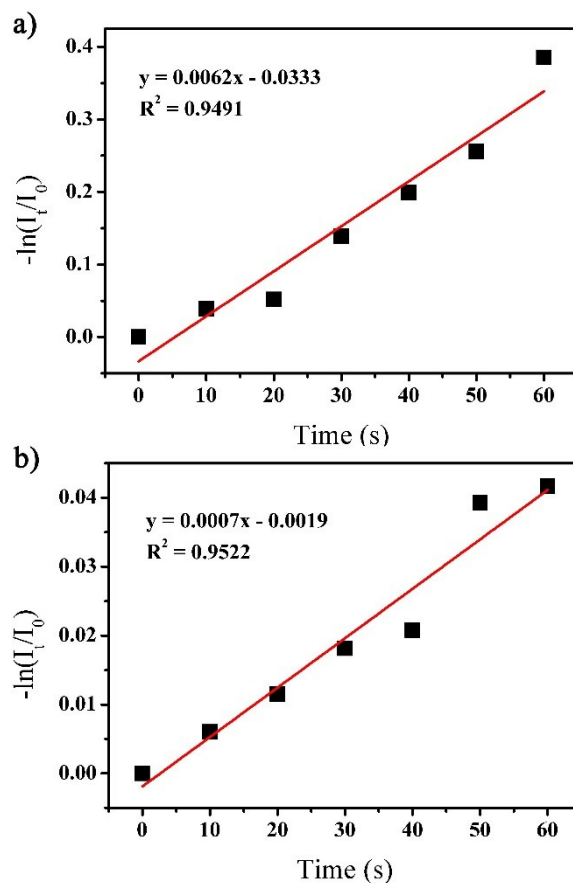

**Fig. S4** a) The curve of the linear relationship between  $\ln(I_t/I_0)$  and the beginning reaction time according to the bands at  $1623\text{ cm}^{-1}$  for the catalytic reduction of MB by  $\text{NaBH}_4$  on the surface of rGO/AgCo composite nanosheets; b) The curve of the linear relationship between  $\ln(I_t/I_0)$  and the beginning reaction time according to the bands at  $1623\text{ cm}^{-1}$  for the catalytic degradation of MB under ultraviolet light on the surface of rGO/AgCo composite nanosheets.

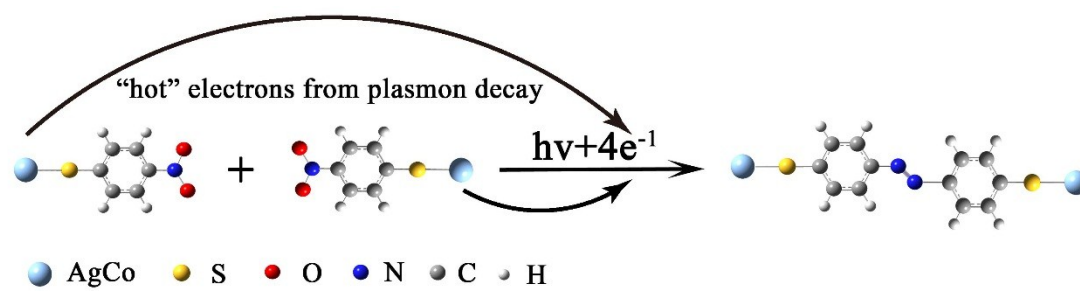

**Fig. S5** Mechanism of the Plasmon-driven surface-catalyzed reaction on the surface of AgCo alloy nanoparticles supported on the rGO nanosheets.
